# Supplementary material for: Silent synapses generate sparse and orthogonal action potential firing in adult-born hippocampal granule cells
Source: eLife journal article supplement (doi:10.7554/elife.23612), 2017-08-08
Supplement: supp [file elife-23612-supp-v1.zip]

Archive with 3 entries (3 files):
- elife_poa_e23612_Figure_1_Supplement_1.pdf
- elife_poa_e23612_Figure_8_Supplement_1.pdf
- elife_poa_e23612_Transparent_Reporting_File.pdf
