# Supplementary figures and images for: Silent synapses generate sparse and orthogonal action potential firing in adult-born hippocampal granule cells
Source: eLife journal article supplement (doi:10.7554/elife.23612), 2017-08-08

**a**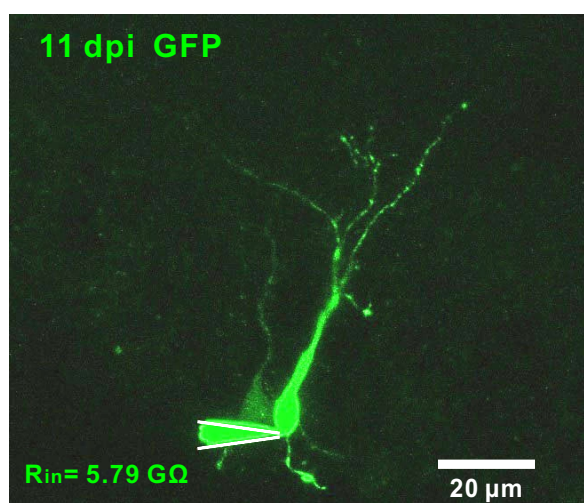**b**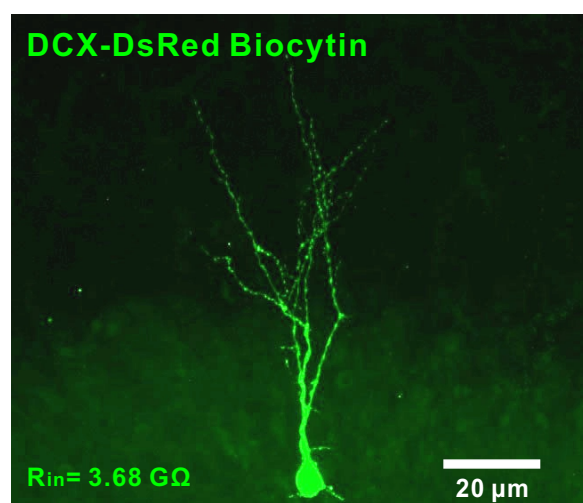**c**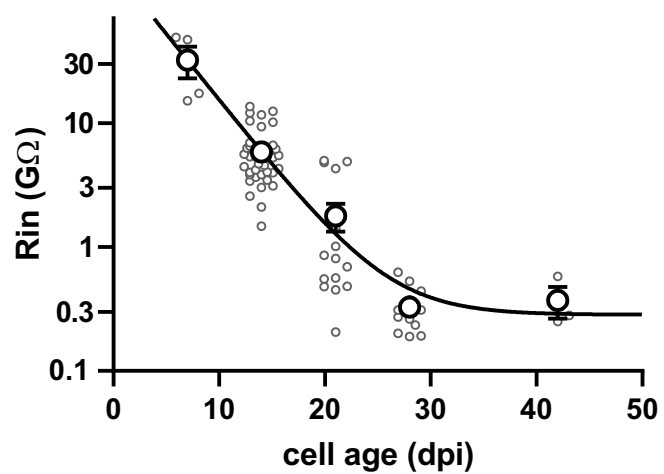**d**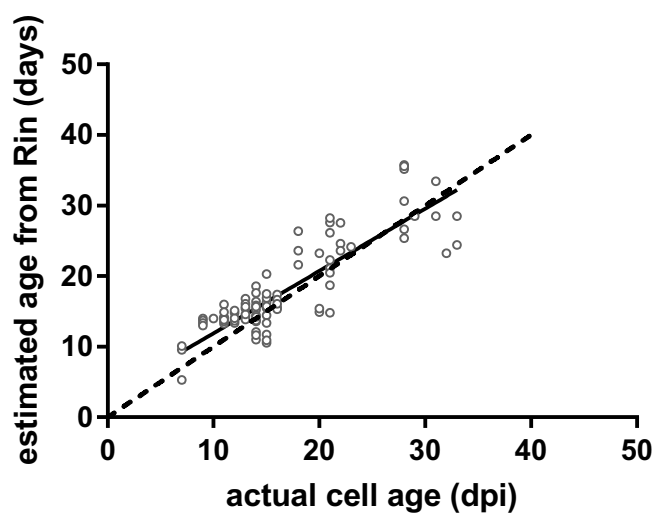

Figure 1- figure supplement 1

Supplement: supp [file elife-23612-supp-v1.zip › elife_poa_e23612_Figure_1_Supplement_1.pdf]

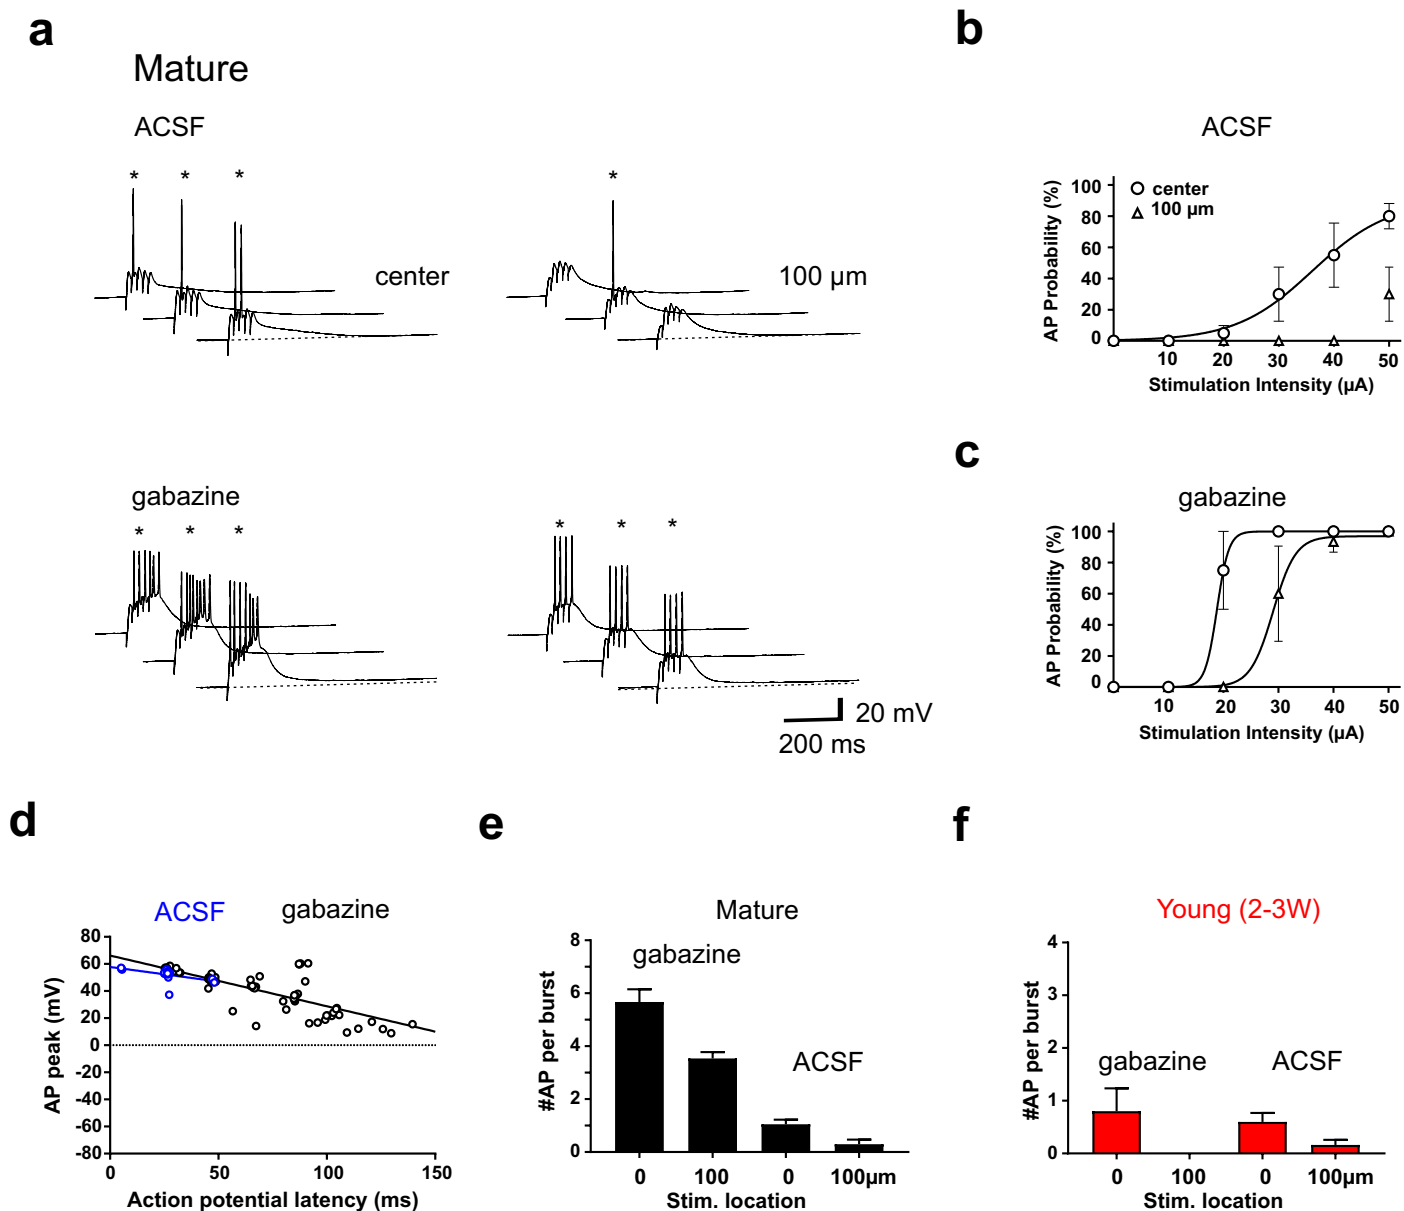

Figure 8 - figure supplement 1

Supplement: supp [file elife-23612-supp-v1.zip › elife_poa_e23612_Figure_8_Supplement_1.pdf]
